# Supplementary material
Source: PubMed Central journal article supplement (PMC11004836)
Supplement: jama-e243172-s002.pdf [file jama-e243172-s002.pdf]

## Data Sharing Statement

### Data

**Data available:** No

### Additional Information

**Explanation for why data not available:** Data sharing statement The Swedish health and population register data used in this study are available from Statistics Sweden and the Swedish National Board of Health and Welfare. The data supporting our findings were used under license and ethical approval for the current study. Readers interested in obtaining microdata or replicating our study may seek similar approvals and inquire through Statistics Sweden. For further advice see: <https://www.scb.se/en/services/guidance-for-researchers-and-universities/>, or contact Statistics Sweden at: [mikrodata@scb.se](mailto:mikrodata@scb.se).
